# Supplementary material for: Analysis of controlling genes for tiller growth of Psathyrostachys juncea based on transcriptome sequencing technology
Source: BMC Plant Biol. 2022 Sep 23;22:456. doi: 10.1186/s12870-022-03837-w (PMC9502641; doi:10.1186/s12870-022-03837-w)
Supplement: Supplementary file 4 — Additional file 4. [file 12870_2022_3837_MOESM4_ESM.xls]

## Sheet: Sheet1
Statistical table of GO enrichment classification of DEGs
Ontology	Class	GO ID	No. of up-regulation unigenes	No. of down-regulation unigenes	Total
Biological process	metabolic process	GO:0008152	967	798	1765
	cellular process	GO:0009987	875	762	1637
	single-organism process	GO:0044699	684	472	1156
	biological regulation	GO:0065007	214	228	442
	localization	GO:0051179	186	129	315
	response to stimulus	GO:0050896	225	158	383
	cellular component organization or biogenesis	GO:0071840	168	109	277
	developmental process	GO:0032502	52	45	97
	signaling	GO:0023052	39	52	91
	multicellular organismal process	GO:0032501	52	45	97
	reproductive process	GO:0022414	30	24	54
	multi-organism process	GO:0051704	23	21	44
	reproduction	GO:0000003	6	9	15
	growth	GO:0040007	8	8	16
	immune system process	GO:0002376	8	6	14
	cell killing	GO:0001906	6	1	7
	rhythmic process	GO:0048511	1	0	1
	locomotion	GO:0040011	0	1	1
	biological adhesion	GO:0022610	0	1	1
Cellular component	cell	GO:0005623	1142	704	1846
	cell part	GO:0044464	1139	702	1841
	organelle	GO:0043226	963	516	1479
	membrane	GO:0016020	711	480	1191
	membrane part	GO:0044425	576	396	972
	organelle part	GO:0044422	378	107	485
	macromolecular complex	GO:0032991	177	90	267
	membrane-enclosed lumen	GO:0031974	30	35	65
	extracellular region	GO:0005576	52	37	89
	cell junction	GO:0030054	27	24	51
	symplast	GO:0055044	27	24	51
	virion	GO:0019012	8	2	10
	virion part	GO:0044423	8	2	10
	extracellular region part	GO:0044421	3	4	7
	nucleoid	GO:0009295	10	0	10
Molecular function	binding	GO:0005488	764	783	1547
	catalytic activity	GO:0003824	838	705	1543
	transporter activity	GO:0005215	105	83	188
	nucleic acid binding transcription factor activity	GO:0001071	37	78	115
	structural molecule activity	GO:0005198	41	8	49
	antioxidant activity	GO:0016209	28	17	45
	electron carrier activity	GO:0009055	31	11	42
	molecular transducer activity	GO:0060089	12	15	27
	signal transducer activity	GO:0004871	12	15	27
	transcription factor activity, protein binding	GO:0000988	7	6	13
	nutrient reservoir activity	GO:0045735	4	1	5
Note: The first column: GO primary classification; The second column: GO secondary classification; The third column: GO number; The fourth and fifth column: the number of DEGs annotated to this GO classification;The sixth column: Number of all DEGs annotated to this GO categories.
