# Supplementary material for: Analysis of controlling genes for tiller growth of Psathyrostachys juncea based on transcriptome sequencing technology
Source: BMC Plant Biol. 2022 Sep 23;22:456. doi: 10.1186/s12870-022-03837-w (PMC9502641; doi:10.1186/s12870-022-03837-w)
Supplement: Supplementary file 5 — Additional file 5. [file 12870_2022_3837_MOESM5_ESM.xls]

## Sheet: Sheet1
Gene information contained in the KEGG pathway
Pathway	KEGG ID	DEGs genes with pathway annotation(723)	All genes with pathway annotation (7885)	P-value	Corrected_P-value	Rich_factor	Count	Up	P-value	Corrected_P-value	Rich_factor	Down	P-value	Corrected_P-value	Rich_factor
Photosynthesis	ko00195	35 out of 723 4.84094052558783%	80 out of 7885 1.0145846544071%	3.01759e-13	3.59093e-11	4.77135	35	33	0	0	7.42594	2	0.791144	1	0.691667
Photosynthesis - antenna proteins	ko00196	18 out of 723 2.4896265560166%	35 out of 7885 0.443880786303107%	1.73964e-10	2.07017e-08	5.60877	18	18	3.40802e-14	3.71474e-12	9.25832	0	-	-	-
Porphyrin and chlorophyll metabolism	ko00860	25 out of 723 3.45781466113416%	74 out of 7885 0.938490805326569%	3.46455e-09	4.12282e-07	3.68444	25	25	1.249e-13	1.36141e-11	6.08185	0	-	-	-
Ubiquinone and other terpenoid-quinone biosynthesis	ko00130	21 out of 723 2.9045643153527%	85 out of 7885 1.07799619530755%	1.84003e-05	0.00218964	2.69441	21	15	5.7604e-05	0.00627884	3.17687	6	0.0865063	1	1.95294
Linoleic acid metabolism	ko00591	13 out of 723 1.79806362378976%	44 out of 7885 0.558021559923906%	0.000102984	0.0122551	3.22221	13	5	0.0951015	1	2.04571	8	0.000150546	0.0147535	5.0303
Phenylpropanoid biosynthesis	ko00940	54 out of 723 7.46887966804979%	361 out of 7885 4.57831325301205%	0.000184124	0.0219108	1.63136	54	31	0.00993973	1	1.5459	23	0.00570222	0.558817	1.7627
Mismatch repair	ko03430	20 out of 723 2.76625172890733%	105 out of 7885 1.33164235890932%	0.001196	0.142324	2.07732	20	6	0.531886	1	1.0287	14	2.24595e-05	0.00220103	3.68889
Carbon fixation in photosynthetic organisms	ko00710	25 out of 723 3.45781466113416%	152 out of 7885 1.92771084337349%	0.00276201	0.328679	1.79374	25	22	3.07342e-05	0.00335003	2.60559	3	0.917235	1	0.546053
Cutin, suberine and wax biosynthesis	ko00073	10 out of 723 1.38312586445367%	43 out of 7885 0.545339251743817%	0.00463097	0.551085	2.53627	10	9	0.000481756	0.0525114	3.76792	1	0.795525	1	0.643411
Anthocyanin biosynthesis	ko00942	1 out of 723 0.138312586445367%	3 out of 7885 0.0380469245402663%	0.250656	1	3.63532	1	1	0.157579	1	6.00076	0	-	-	-
Flavone and flavonol biosynthesis	ko00944	2 out of 723 0.276625172890733%	7 out of 7885 0.0887761572606214%	0.129426	1	3.11598	2	2	0.0536823	1	5.14351	0	-	-	-
Stilbenoid, diarylheptanoid and gingerol biosynthesis	ko00945	9 out of 723 1.2448132780083%	41 out of 7885 0.51997463538364%	0.0104849	1	2.39399	9	6	0.0244491	1	2.63448	3	0.183828	1	2.02439
Carotenoid biosynthesis	ko00906	10 out of 723 1.38312586445367%	49 out of 7885 0.62143310082435%	0.0120446	1	2.2257	10	9	0.00130536	0.142284	3.30654	1	0.836264	1	0.564626
Sesquiterpenoid and triterpenoid biosynthesis	ko00909	3 out of 723 0.4149377593361%	15 out of 7885 0.190234622701332%	0.152821	1	2.18119	3	1	0.576011	1	1.20015	2	0.100358	1	3.68889
Thiamine metabolism	ko00730	5 out of 723 0.691562932226833%	25 out of 7885 0.317057704502219%	0.0728599	1	2.18119	5	2	0.408277	1	1.44018	3	0.0597838	1	3.32
Biotin metabolism	ko00780	6 out of 723 0.829875518672199%	32 out of 7885 0.405833861762841%	0.0673979	1	2.04487	6	5	0.0300926	1	2.81286	1	0.692848	1	0.864583
Flavonoid biosynthesis	ko00941	12 out of 723 1.6597510373444%	69 out of 7885 0.875079264426126%	0.0217748	1	1.89669	12	9	0.0135365	1	2.34812	3	0.457498	1	1.2029
Phenylalanine metabolism	ko00360	15 out of 723 2.0746887966805%	91 out of 7885 1.15409004438808%	0.0177443	1	1.79768	15	5	0.575371	1	0.989136	10	0.00156981	0.153842	3.04029
Tropane, piperidine and pyridine alkaloid biosynthesis	ko00960	7 out of 723 0.968188105117566%	44 out of 7885 0.558021559923906%	0.103526	1	1.73504	7	7	0.00998688	1	2.864	0	-	-	-
Cyanoamino acid metabolism	ko00460	17 out of 723 2.35131396957123%	109 out of 7885 1.38237159162968%	0.0202562	1	1.70093	17	14	0.0027154	0.295978	2.31222	3	0.76033	1	0.761468
Pentose phosphate pathway	ko00030	17 out of 723 2.35131396957123%	109 out of 7885 1.38237159162968%	0.0202562	1	1.70093	17	14	0.0027154	0.295978	2.31222	3	0.76033	1	0.761468
Limonene and pinene degradation	ko00903	2 out of 723 0.276625172890733%	13 out of 7885 0.164870006341154%	0.337699	1	1.67784	2	2	0.160476	1	2.76958	0	-	-	-
Glycosphingolipid biosynthesis - globo series	ko00603	2 out of 723 0.276625172890733%	13 out of 7885 0.164870006341154%	0.337699	1	1.67784	2	1	0.524574	1	1.38479	1	0.380568	1	2.12821
Selenocompound metabolism	ko00450	6 out of 723 0.829875518672199%	40 out of 7885 0.507292327203551%	0.155479	1	1.63589	6	2	0.659876	1	0.900114	4	0.0551478	1	2.76667
Arginine and proline metabolism	ko00330	13 out of 723 1.79806362378976%	95 out of 7885 1.20481927710843%	0.0924977	1	1.49239	13	7	0.275357	1	1.32648	6	0.128773	1	1.74737
DNA replication	ko03030	17 out of 723 2.35131396957123%	125 out of 7885 1.5852885225111%	0.0635155	1	1.48321	17	5	0.831759	1	0.720091	12	0.00181281	0.177656	2.656
Glyoxylate and dicarboxylate metabolism	ko00630	18 out of 723 2.4896265560166%	133 out of 7885 1.68674698795181%	0.0597111	1	1.47599	18	17	0.0010524	0.114712	2.30104	1	0.992835	1	0.20802
Fructose and mannose metabolism	ko00051	14 out of 723 1.93637621023513%	104 out of 7885 1.31896005072923%	0.092248	1	1.46811	14	9	0.123071	1	1.55789	5	0.322946	1	1.33013
Cysteine and methionine metabolism	ko00270	25 out of 723 3.45781466113416%	189 out of 7885 2.39695624603678%	0.0387372	1	1.44259	25	14	0.165907	1	1.3335	11	0.080631	1	1.61023
Protein export	ko03060	10 out of 723 1.38312586445367%	77 out of 7885 0.976537729866836%	0.164795	1	1.41636	10	7	0.13459	1	1.63657	3	0.530866	1	1.07792
Glycolysis / Gluconeogenesis	ko00010	30 out of 723 4.149377593361%	231 out of 7885 2.92961318960051%	0.0315727	1	1.41636	30	21	0.0174837	1	1.63657	9	0.45764	1	1.07792
alpha-Linolenic acid metabolism	ko00592	10 out of 723 1.38312586445367%	79 out of 7885 1.00190234622701%	0.184656	1	1.3805	10	4	0.646672	1	0.911508	6	0.0654782	1	2.10127
Brassinosteroid biosynthesis	ko00905	2 out of 723 0.276625172890733%	16 out of 7885 0.20291693088142%	0.438797	1	1.36324	2	0	-	-	-	2	0.112059	1	3.45833
Vitamin B6 metabolism	ko00750	2 out of 723 0.276625172890733%	16 out of 7885 0.20291693088142%	0.438797	1	1.36324	2	1	0.599608	1	1.12514	1	0.445448	1	1.72917
Plant-pathogen interaction	ko04626	35 out of 723 4.84094052558783%	281 out of 7885 3.56372859860495%	0.0371522	1	1.35839	35	5	0.999648	1	0.320325	30	7.98871e-08	7.82893e-06	2.95374
Ascorbate and aldarate metabolism	ko00053	8 out of 723 1.10650069156293%	65 out of 7885 0.82435003170577%	0.242769	1	1.34227	8	7	0.0676617	1	1.93871	1	0.909541	1	0.425641
Riboflavin metabolism	ko00740	2 out of 723 0.276625172890733%	17 out of 7885 0.215599239061509%	0.470625	1	1.28305	2	2	0.243026	1	2.11792	0	-	-	-
Isoquinoline alkaloid biosynthesis	ko00950	5 out of 723 0.691562932226833%	44 out of 7885 0.558021559923906%	0.378051	1	1.23931	5	5	0.0951015	1	2.04571	0	-	-	-
Carbon metabolism	ko01200	56 out of 723 7.74550484094053%	495 out of 7885 6.27774254914394%	0.0549322	1	1.2338	56	44	0.00116673	0.127174	1.6002	12	0.950962	1	0.670707
Lysine biosynthesis	ko00300	3 out of 723 0.4149377593361%	27 out of 7885 0.342422320862397%	0.455979	1	1.21177	3	2	0.447144	1	1.3335	1	0.630517	1	1.02469
Galactose metabolism	ko00052	15 out of 723 2.0746887966805%	136 out of 7885 1.72479391249207%	0.26331	1	1.20286	15	6	0.774666	1	0.794218	9	0.0575925	1	1.83088
Butanoate metabolism	ko00650	4 out of 723 0.553250345781466%	37 out of 7885 0.469245402663285%	0.444272	1	1.17902	4	3	0.338648	1	1.45964	1	0.744694	1	0.747748
Nitrogen metabolism	ko00910	5 out of 723 0.691562932226833%	47 out of 7885 0.596068484464172%	0.434349	1	1.16021	5	1	0.932403	1	0.383027	4	0.0888026	1	2.35461
Homologous recombination	ko03440	14 out of 723 1.93637621023513%	132 out of 7885 1.67406467977172%	0.32372	1	1.15669	14	5	0.864814	1	0.681905	9	0.0493421	1	1.88636
Nucleotide excision repair	ko03420	15 out of 723 2.0746887966805%	145 out of 7885 1.83893468611287%	0.35084	1	1.1282	15	5	0.911803	1	0.620768	10	0.0369979	1	1.90805
Sulfur metabolism	ko00920	6 out of 723 0.829875518672199%	58 out of 7885 0.735573874445149%	0.442439	1	1.1282	6	4	0.403845	1	1.24154	2	0.625678	1	0.954023
Glycerolipid metabolism	ko00561	11 out of 723 1.52143845089903%	107 out of 7885 1.3570069752695%	0.391835	1	1.12117	11	8	0.243034	1	1.34597	3	0.749166	1	0.775701
Fatty acid biosynthesis	ko00061	9 out of 723 1.2448132780083%	88 out of 7885 1.11604311984781%	0.41743	1	1.11538	9	7	0.216079	1	1.432	2	0.833125	1	0.628788
Ether lipid metabolism	ko00565	5 out of 723 0.691562932226833%	49 out of 7885 0.62143310082435%	0.471283	1	1.11285	5	4	0.288652	1	1.46957	1	0.836264	1	0.564626
Tyrosine metabolism	ko00350	8 out of 723 1.10650069156293%	80 out of 7885 1.0145846544071%	0.453664	1	1.09059	8	8	0.0751723	1	1.80023	0	-	-	-
Starch and sucrose metabolism	ko00500	36 out of 723 4.9792531120332%	361 out of 7885 4.57831325301205%	0.320548	1	1.08757	36	20	0.539264	1	0.997356	16	0.23319	1	1.22622
Glutathione metabolism	ko00480	20 out of 723 2.76625172890733%	202 out of 7885 2.56182625237793%	0.39301	1	1.0798	20	10	0.692584	1	0.891202	10	0.195346	1	1.36964
Biosynthesis of unsaturated fatty acids	ko01040	7 out of 723 0.968188105117566%	71 out of 7885 0.900443880786303%	0.479234	1	1.07523	7	5	0.359739	1	1.26777	2	0.733079	1	0.779343
Pentose and glucuronate interconversions	ko00040	7 out of 723 0.968188105117566%	72 out of 7885 0.913126188966392%	0.494353	1	1.0603	7	3	0.771479	1	0.750095	4	0.262445	1	1.53704
Steroid biosynthesis	ko00100	6 out of 723 0.829875518672199%	62 out of 7885 0.786303107165504%	0.508446	1	1.05541	6	3	0.677548	1	0.871078	3	0.389636	1	1.33871
Pantothenate and CoA biosynthesis	ko00770	5 out of 723 0.691562932226833%	52 out of 7885 0.659480025364616%	0.525115	1	1.04865	5	4	0.326896	1	1.38479	1	0.85349	1	0.532051
Glycosaminoglycan degradation	ko00531	2 out of 723 0.276625172890733%	21 out of 7885 0.266328471781864%	0.586299	1	1.03866	2	0	-	-	-	2	0.174787	1	2.63492
Plant hormone signal transduction	ko04075	30 out of 723 4.149377593361%	315 out of 7885 3.99492707672796%	0.441388	1	1.03866	30	21	0.00136673	0.227174	3.62865	9	0.23319	1	1.66878
Sphingolipid metabolism	ko00600	5 out of 723 0.691562932226833%	53 out of 7885 0.672162333544705%	0.542527	1	1.02886	5	2	0.801871	1	0.679331	3	0.299942	1	1.56604
Glycine, serine and threonine metabolism	ko00260	13 out of 723 1.79806362378976%	139 out of 7885 1.76284083703234%	0.513347	1	1.01998	13	10	0.243555	1	1.29513	3	0.884122	1	0.597122
Amino sugar and nucleotide sugar metabolism	ko00520	21 out of 723 2.9045643153527%	226 out of 7885 2.86620164870006%	0.50873	1	1.01338	21	10	0.814148	1	0.796561	11	0.19484	1	1.34661
Terpenoid backbone biosynthesis	ko00900	8 out of 723 1.10650069156293%	89 out of 7885 1.1287254280279%	0.577785	1	0.98031	8	7	0.224255	1	1.41591	1	0.96294	1	0.310861
Ribosome biogenesis in eukaryotes	ko03008	18 out of 723 2.4896265560166%	208 out of 7885 2.63792010145847%	0.638847	1	0.943784	18	3	0.999462	1	0.259648	15	0.00827311	0.810765	1.99519
Histidine metabolism	ko00340	3 out of 723 0.4149377593361%	35 out of 7885 0.443880786303107%	0.634681	1	0.934795	3	3	0.307641	1	1.54305	0	-	-	-
Diterpenoid biosynthesis	ko00904	3 out of 723 0.4149377593361%	36 out of 7885 0.456563094483196%	0.653915	1	0.908829	3	2	0.602261	1	1.00013	1	0.735075	1	0.768519
Phenylalanine, tyrosine and tryptophan biosynthesis	ko00400	6 out of 723 0.829875518672199%	73 out of 7885 0.925808497146481%	0.670887	1	0.896379	6	3	0.779516	1	0.73982	3	0.49484	1	1.13699
Pyrimidine metabolism	ko00240	18 out of 723 2.4896265560166%	219 out of 7885 2.77742549143944%	0.72353	1	0.896379	18	10	0.783014	1	0.822022	8	0.53937	1	1.01065
Glycerophospholipid metabolism	ko00564	13 out of 723 1.79806362378976%	159 out of 7885 2.01648700063412%	0.709623	1	0.891681	13	7	0.788023	1	0.792553	6	0.516402	1	1.04403
Biosynthesis of amino acids	ko01230	34 out of 723 4.70262793914246%	416 out of 7885 5.27584020291693%	0.789161	1	0.891351	34	27	0.0027154	0.295978	2.31222	7	0.939783	1	0.665064
Valine, leucine and isoleucine degradation	ko00280	7 out of 723 0.968188105117566%	86 out of 7885 1.09067850348763%	0.685181	1	0.887693	7	6	0.343553	1	1.25597	1	0.95856	1	0.321705
Peroxisome	ko04146	13 out of 723 1.79806362378976%	163 out of 7885 2.06721623335447%	0.742371	1	0.869799	13	10	0.419926	1	1.10443	3	0.93827	1	0.509202
Aminoacyl-tRNA biosynthesis	ko00970	11 out of 723 1.52143845089903%	142 out of 7885 1.80088776157261%	0.764823	1	0.844827	11	8	0.535985	1	1.01421	3	0.89267	1	0.584507
Zeatin biosynthesis	ko00908	2 out of 723 0.276625172890733%	26 out of 7885 0.329740012682308%	0.703102	1	0.838919	2	0	-	-	-	2	0.241579	1	2.12821
Monobactam biosynthesis	ko00261	2 out of 723 0.276625172890733%	26 out of 7885 0.329740012682308%	0.703102	1	0.838919	2	1	0.774256	1	0.692396	1	0.616614	1	1.0641
Alanine, aspartate and glutamate metabolism	ko00250	8 out of 723 1.10650069156293%	105 out of 7885 1.33164235890932%	0.758776	1	0.830929	8	5	0.701037	1	0.857252	3	0.737592	1	0.790476
Base excision repair	ko03410	5 out of 723 0.691562932226833%	67 out of 7885 0.849714648065948%	0.747944	1	0.813877	5	1	0.978629	1	0.268691	4	0.222977	1	1.65174
One carbon pool by folate	ko00670	2 out of 723 0.276625172890733%	27 out of 7885 0.342422320862397%	0.722872	1	0.807848	2	2	0.447144	1	1.3335	0	-	-	-
Fatty acid metabolism	ko01212	11 out of 723 1.52143845089903%	149 out of 7885 1.88966391883323%	0.816095	1	0.805137	11	9	0.447397	1	1.08739	2	0.973656	1	0.371365
Purine metabolism	ko00230	21 out of 723 2.9045643153527%	286 out of 7885 3.62714013950539%	0.886572	1	0.800786	21	12	0.87892	1	0.755341	9	0.712893	1	0.870629
Inositol phosphate metabolism	ko00562	7 out of 723 0.968188105117566%	98 out of 7885 1.2428662016487%	0.806668	1	0.778996	7	5	0.641604	1	0.918484	2	0.874848	1	0.564626
Nicotinate and nicotinamide metabolism	ko00760	2 out of 723 0.276625172890733%	28 out of 7885 0.355104629042486%	0.741518	1	0.778996	2	2	0.466036	1	1.28588	0	-	-	-
RNA degradation	ko03018	13 out of 723 1.79806362378976%	188 out of 7885 2.38427393785669%	0.890991	1	0.754135	13	7	0.904697	1	0.670298	6	0.679756	1	0.882979
Pyruvate metabolism	ko00620	11 out of 723 1.52143845089903%	160 out of 7885 2.0291693088142%	0.879089	1	0.749784	11	9	0.534034	1	1.01263	2	0.981454	1	0.345833
Tryptophan metabolism	ko00380	5 out of 723 0.691562932226833%	73 out of 7885 0.925808497146481%	0.811745	1	0.746983	5	4	0.583952	1	0.986426	1	0.932794	1	0.378995
RNA polymerase	ko03020	5 out of 723 0.691562932226833%	75 out of 7885 0.951173113506658%	0.829912	1	0.727063	5	2	0.926505	1	0.480061	3	0.513029	1	1.10667
Ribosome	ko03010	37 out of 723 5.11756569847856%	556 out of 7885 7.05136334812936%	0.988927	1	0.725755	37	34	0.301402	1	1.10086	3	1	1	0.149281
SNARE interactions in vesicular transport	ko04130	3 out of 723 0.4149377593361%	46 out of 7885 0.583386176284084%	0.806749	1	0.711257	3	0	-	-	-	3	0.230982	1	1.80435
beta-Alanine metabolism	ko00410	4 out of 723 0.553250345781466%	63 out of 7885 0.798985415345593%	0.841893	1	0.692441	4	3	0.688088	1	0.857252	1	0.90257	1	0.439153
Phosphatidylinositol signaling system	ko04070	7 out of 723 0.968188105117566%	112 out of 7885 1.42041851616994%	0.898923	1	0.681622	7	6	0.59593	1	0.964408	1	0.984283	1	0.247024
Valine, leucine and isoleucine biosynthesis	ko00290	2 out of 723 0.276625172890733%	32 out of 7885 0.405833861762841%	0.805689	1	0.681622	2	1	0.839993	1	0.562571	1	0.692848	1	0.864583
Non-homologous end-joining	ko03450	1 out of 723 0.138312586445367%	16 out of 7885 0.20291693088142%	0.785684	1	0.681622	1	1	0.599608	1	1.12514	0	-	-	-
mRNA surveillance pathway	ko03015	12 out of 723 1.6597510373444%	193 out of 7885 2.44768547875713%	0.947825	1	0.67809	12	5	0.984915	1	0.46638	7	0.55116	1	1.00345
Glycosylphosphatidylinositol(GPI)-anchor biosynthesis	ko00563	2 out of 723 0.276625172890733%	34 out of 7885 0.431198478123018%	0.832134	1	0.641526	2	1	0.857345	1	0.529479	1	0.714739	1	0.813725
Lysine degradation	ko00310	4 out of 723 0.553250345781466%	70 out of 7885 0.887761572606214%	0.894967	1	0.623197	4	3	0.75469	1	0.771526	1	0.92487	1	0.395238
Phagosome	ko04145	8 out of 723 1.10650069156293%	141 out of 7885 1.78820545339252%	0.95326	1	0.618777	8	4	0.958109	1	0.510703	4	0.755976	1	0.78487
ABC transporters	ko02010	3 out of 723 0.4149377593361%	53 out of 7885 0.672162333544705%	0.876162	1	0.617318	3	1	0.952133	1	0.339666	2	0.576293	1	1.04403
Endocytosis	ko04144	15 out of 723 2.0746887966805%	269 out of 7885 3.41154090044388%	0.989707	1	0.608138	15	11	0.889759	1	0.736153	4	0.989419	1	0.4114
AGE-RAGE signaling pathway in diabetic complications	ko04933	1 out of 723 0.138312586445367%	18 out of 7885 0.228281547241598%	0.82326	1	0.605886	1	1	0.642943	1	1.00013	0	-	-	-
Fatty acid degradation	ko00071	5 out of 723 0.691562932226833%	94 out of 7885 1.19213696892834%	0.940657	1	0.580104	5	5	0.604544	1	0.957568	0	-	-	-
Other glycan degradation	ko00511	2 out of 723 0.276625172890733%	38 out of 7885 0.481927710843373%	0.875492	1	0.573997	2	2	0.631946	1	0.947489	0	-	-	-
Arginine biosynthesis	ko00220	3 out of 723 0.4149377593361%	57 out of 7885 0.72289156626506%	0.905022	1	0.573997	3	2	0.83354	1	0.631659	1	0.878279	1	0.48538
Ubiquitin mediated proteolysis	ko04120	12 out of 723 1.6597510373444%	237 out of 7885 3.00570703868104%	0.993959	1	0.5522	12	3	0.999875	1	0.227877	9	0.488541	1	1.05063
2-Oxocarboxylic acid metabolism	ko01210	5 out of 723 0.691562932226833%	99 out of 7885 1.25554850982879%	0.956041	1	0.550805	5	3	0.918946	1	0.545524	2	0.878446	1	0.558923
Taurine and hypotaurine metabolism	ko00430	1 out of 723 0.138312586445367%	22 out of 7885 0.279010779961953%	0.87982	1	0.495725	1	0	-	-	-	1	0.55559	1	1.25758
Sulfur relay system	ko04122	1 out of 723 0.138312586445367%	23 out of 7885 0.291693088142042%	0.890871	1	0.474172	1	0	-	-	-	1	0.571698	1	1.2029
RNA transport	ko03013	13 out of 723 1.79806362378976%	302 out of 7885 3.83005707038681%	0.999649	1	0.469461	13	6	0.99948	1	0.357661	7	0.925615	1	0.64128
Oxidative phosphorylation	ko00190	9 out of 723 1.2448132780083%	223 out of 7885 2.8281547241598%	0.999059	1	0.44015	9	6	0.987059	1	0.484366	3	0.988801	1	0.372197
Folate biosynthesis	ko00790	1 out of 723 0.138312586445367%	25 out of 7885 0.317057704502219%	0.91002	1	0.436238	1	0	-	-	-	1	0.602189	1	1.10667
Protein processing in endoplasmic reticulum	ko04141	13 out of 723 1.79806362378976%	330 out of 7885 4.1851616994293%	0.999938	1	0.429628	13	9	0.995786	1	0.490971	4	0.998171	1	0.335354
Proteasome	ko03050	4 out of 723 0.553250345781466%	103 out of 7885 1.30627774254914%	0.988085	1	0.423532	4	2	0.980938	1	0.349559	2	0.891905	1	0.537217
Arachidonic acid metabolism	ko00590	1 out of 723 0.138312586445367%	30 out of 7885 0.380469245402663%	0.944467	1	0.363532	1	0	-	-	-	1	0.669283	1	0.922222
Fatty acid elongation	ko00062	2 out of 723 0.276625172890733%	61 out of 7885 0.773620798985415%	0.980052	1	0.357572	2	2	0.860572	1	0.590239	0	-	-	-
Circadian rhythm - plant	ko04712	2 out of 723 0.276625172890733%	64 out of 7885 0.811667723525682%	0.98445	1	0.340811	2	2	0.878146	1	0.562571	0	-	-	-
Spliceosome	ko03040	12 out of 723 1.6597510373444%	386 out of 7885 4.89537095751427%	1	1	0.339045	12	5	0.999998	1	0.23319	7	0.988211	1	0.501727
Propanoate metabolism	ko00640	1 out of 723 0.138312586445367%	51 out of 7885 0.646797717184528%	0.99271	1	0.213842	1	1	0.946295	1	0.352986	0	-	-	-
Regulation of autophagy	ko04140	1 out of 723 0.138312586445367%	55 out of 7885 0.697526949904883%	0.995051	1	0.19829	1	0	-	-	-	1	0.868909	1	0.50303
Citrate cycle (TCA cycle)	ko00020	2 out of 723 0.276625172890733%	112 out of 7885 1.42041851616994%	0.999758	1	0.194749	2	2	0.987823	1	0.321469	0	-	-	-
N-Glycan biosynthesis	ko00510	1 out of 723 0.138312586445367%	61 out of 7885 0.773620798985415%	0.997233	1	0.178786	1	1	0.969801	1	0.295119	0	-	-	-
Basal transcription factors	ko03022	1 out of 723 0.138312586445367%	80 out of 7885 1.0145846544071%	0.999563	1	0.136324	1	0	-	-	-	1	0.948194	1	0.345833
Note: The first column: the pathway name; The second column: the pathway number; The third column: the number of related differentially expressed genes in this pathway; The fourth column: the number of all genes related to this pathway; The fifth column: the pathway enrichment P value calculated using hypergeometric distribution; The sixth column: using Bonferroni Corrected P value; The seventh c…
