# Supplementary material for: Analysis of controlling genes for tiller growth of Psathyrostachys juncea based on transcriptome sequencing technology
Source: BMC Plant Biol. 2022 Sep 23;22:456. doi: 10.1186/s12870-022-03837-w (PMC9502641; doi:10.1186/s12870-022-03837-w)
Supplement: Supplementary file 6 — Additional file 6. [file 12870_2022_3837_MOESM6_ESM.xls]

## Sheet: Sheet1
Enrichment pathways of the DEGs
KEGG pathway	Gene ID	Pvalue	log2FC	up or down	Gene name
Photosynthesis (ko00195)	BMK_Unigene_019514	4.52777e-85	2.1095	up	Photosystem I reaction center subunit XI (PSAL)
	BMK_Unigene_029823	2.94393e-23	1.38956	up	Ferredoxin--NADP reductase, leaf isozyme 1 (OsI_21320)
	BMK_Unigene_022920	5.11644e-06	1.16007	up	Ferredoxin--NADP reductase, leaf isozyme 1 (OsI_21320)
	BMK_Unigene_023994	9.27043e-61	1.47334	up	Photosystem II 10 kDa polypeptide (PSBR)
	BMK_Unigene_074080	6.42087e-32	1.53453	up	ATP synthase delta chain (ATPD)
	BMK_Unigene_022404	3.03355e-97	2.18454	up	Photosystem I reaction center subunit psaK (PSAK)
	BMK_Unigene_133263	1.07716e-14	1.52867	up	Ferredoxin--NADP reductase, leaf isozyme 1 (OsI_21320)
	BMK_Unigene_066848	0.00154889	-1.01462	down	Photosystem II 10 kDa polypeptide (PSBR)
	BMK_Unigene_136927	0.00534028	-0.664222	down	Photosystem II 10 kDa polypeptide (PSBR)
	BMK_Unigene_021005	7.94106e-66	2.22511	up	Photosystem I subunit O (PSAO)
	BMK_Unigene_030456	4.67861e-46	1.38619	up	Oxygen-evolving enhancer protein 1 (PSBO)
	BMK_Unigene_010113	8.29558e-11	1.30127	up	Photosystem II repair protein PSB27-H1 (PSB27-1)
	BMK_Unigene_020429	1.35172e-59	1.88872	up	Photosystem I reaction center subunit III (PSAF)
	BMK_Unigene_024728	2.38613e-84	1.80297	up	Plastocyanin (PETE)
	BMK_Unigene_030969	1.00352e-08	0.664937	up	Ferredoxin C 1 (FDC1)
	BMK_Unigene_007222	1.72315e-25	1.62724	up	Ferredoxin (PETF)
	BMK_Unigene_193882	0.000168046	1.21365	up	Photosynthetic NDH subunit of lumenal location 2 (PNSL2)
	BMK_Unigene_029045	4.5462e-47	1.81118	up	Cytochrome b6-f complex iron-sulfur subunit (petC)
	BMK_Unigene_194232	1.67867e-06	1.0518	up	Photosystem II reaction center protein K (psbK)
	BMK_Unigene_122621	7.48531e-10	1.29375	up	Photosystem II reaction center W protein (psbK)
	BMK_Unigene_017190	6.61993e-15	1.40641	up	Photosystem II core complex proteins psbY (psbK)
	BMK_Unigene_028966	4.56063e-45	1.8733	up	Photosystem II 22 kDa protein (psbK)
	BMK_Unigene_027727	0.000643784	0.64798	up	Photosystem II CP43 reaction center protein (psbC)
	BMK_Unigene_029044	1.06244e-16	1.63944	up	Oxygen-evolving enhancer protein 2 (PSBP)
	BMK_Unigene_021046	4.97041e-28	1.28036	up	ATP synthase subunit b&apos (ATPG)
	BMK_Unigene_001323	4.38096e-94	2.10351	up	Photosystem I reaction center subunit II (psaD)
	BMK_Unigene_029528	3.22613e-20	1.42937	up	PsbP-like protein 1 (PPL1)
	BMK_Unigene_173612	1.18845e-31	1.6751	up	Photosystem II core complex proteins psbY (PSBY)
	BMK_Unigene_140814	0.00149733	0.8484	up	Ferredoxin-3 (FDX3)
	BMK_Unigene_043929	1.19354e-43	1.77925	up	Ferredoxin (PETF)
	BMK_Unigene_019291	7.11286e-15	1.82697	up	Photosystem I reaction center subunit IV (PSAE)
	BMK_Unigene_146523	5.40825e-09	1.17398	up	Ferredoxin C 2 (FDC2)
	BMK_Unigene_042553	5.47619e-57	2.25185	up	Photosystem I reaction center subunit V (PSAG)
	BMK_Unigene_019604	4.80126e-11	1.82118	up	Photosystem I reaction center subunit VI (PSAH)
	BMK_Unigene_019914	2.04546e-82	2.61945	up	Photosystem I reaction center subunit N (PSAN)
Carbon metabolism (ko01200)	BMK_Unigene_145848	5.65057e-06	1.02781	up	Probable ribose-5-phosphate isomerase 4 (RPI4)
	BMK_Unigene_014980	0.000195022	-0.839018	down	Glutamate dehydrogenase 1 (GDH1)
	BMK_Unigene_000393	1.17828e-35	1.95744	up	Sedoheptulose-1,7-bisphosphatase
	BMK_Unigene_180019	7.15286e-38	1.21729	up	Phosphoglycerate kinase
	BMK_Unigene_141921	0.00762368	0.727708	up	Cysteine synthase (CYS1)
	BMK_Unigene_031035	2.24546e-32	1.84731	up	Serine--glyoxylate aminotransferase (AGT1)
	BMK_Unigene_099629	2.89414e-29	1.39166	up	Fructose-1,6-bisphosphatase (FBP)
	BMK_Unigene_131724	0.000724277	1.13025	up	Hexokinase-4 (HXK4)
	BMK_Unigene_157336	0.000580719	0.711907	up	Glyoxylate/succinic semialdehyde reductase 2 (GLYR2)
	BMK_Unigene_133283	1.22896e-24	1.43628	up	Glycerate dehydrogenase (HPR)
	BMK_Unigene_047660	0.000532466	0.958629	up	Ribulose bisphosphate carboxylase large chain (rbcL)
	BMK_Unigene_052931	1.091e-21	2.10229	up	Fructose-bisphosphate aldolase (ALDP)
	BMK_Unigene_162159	3.45373e-17	1.85015	up	Glyceraldehyde-3-phosphate dehydrogenase A (GAPA)
	BMK_Unigene_173812	1.36307e-05	1.45374	up	Peroxisomal (S)-2-hydroxy-acid oxidase (GLO1)
	BMK_Unigene_072865	7.4011e-06	-0.600671	down	Phosphoglycerate mutase-like protein 4 (At3g50520)
	BMK_Unigene_069306	1.58202e-11	0.802633	up	ATP-dependent 6-phosphofructokinase 2 (PFK2)
	BMK_Unigene_078934	3.37553e-06	-0.681893	down	Glucose-6-phosphate 1-dehydrogenase, cytoplasmic isoform (G6PDH)
	BMK_Unigene_044672	1.79074e-05	1.4305	up	Glyoxylate/hydroxypyruvate reductase (HPR3)
	BMK_Unigene_173337	1.29539e-09	0.951132	up	NADP-dependent glyceraldehyde-3-phosphate dehydrogenase (GAPN)
	BMK_Unigene_142232	0.00396412	0.809637	up	Glucose-6-phosphate 1-dehydrogenase (G6PD)
	BMK_Unigene_076101	6.11073e-60	2.29554	up	Ribulose bisphosphate carboxylase small chain
	BMK_Unigene_131976	0.00176079	0.635023	up	Malate dehydrogenase (Os12g0632700)
	BMK_Unigene_186336	1.06377e-05	0.604559	up	ATP-dependent 6-phosphofructokinase 2 (PFK2)
	BMK_Unigene_001550	2.90267e-07	-0.858281	down	Glucose-6-phosphate isomerase (PHI1)
	BMK_Unigene_029652	6.53678e-49	2.22875	up	Phosphoribulokinase
	BMK_Unigene_142707	4.9579e-12	-0.904038	down	Catalase isozyme 3 (CAT3)
	BMK_Unigene_073727	3.38818e-07	0.799221	up	D-3-phosphoglycerate dehydrogenase 1 (PGDH1)
	BMK_Unigene_041226	0.00317843	0.604268	up	Glyceraldehyde-3-phosphate dehydrogenase (GAPCP2)
	BMK_Unigene_066159	0.000130778	1.2708	up	Glyceraldehyde-3-phosphate dehydrogenase (GAPB)
	BMK_Unigene_074802	3.84037e-06	-1.24611	down	--
	BMK_Unigene_070107	3.50552e-05	-0.960908	down	Triosephosphate isomerase (TPI)
	BMK_Unigene_072018	0.00274576	-0.612479	down	NADP-dependent malic enzyme (ME6)
	BMK_Unigene_064109	7.38531e-05	0.741784	up	Glyoxylate/succinic semialdehyde reductase 2 (GLYR2)
	BMK_Unigene_044516	3.19047e-07	1.267	up	Peroxisomal (S)-2-hydroxy-acid oxidase (GLO1)
	BMK_Unigene_022444	5.50102e-05	1.27056	up	Catalase-1 (CAT1)
	BMK_Unigene_096612	3.98583e-40	2.02702	up	Glyceraldehyde-3-phosphate dehydrogenase (GAPB)
	BMK_Unigene_046433	0.000334997	0.992246	up	Fructose-1,6-bisphosphatase
	BMK_Unigene_040534	1.56059e-09	0.69012	up	Ribose-phosphate pyrophosphokinase 1 (PRS1)
	BMK_Unigene_021338	2.04929e-09	0.653097	up	Probable ribose-5-phosphate isomerase 3 (RPI3)
	BMK_Unigene_026139	1.21184e-22	-0.622265	down	ATP-dependent 6-phosphofructokinase 3 (PFK3)
	BMK_Unigene_135860	9.2296e-48	1.70304	up	Cysteine synthase (CYS1)
	BMK_Unigene_029617	4.79279e-16	0.889112	up	Aminomethyltransferase (GDCST)
	BMK_Unigene_162870	0.00169523	0.606241	up	Pyruvate kinase isozyme A
	BMK_Unigene_141448	6.82569e-05	1.33737	up	Glyceraldehyde-3-phosphate dehydrogenase (GAPB)
	BMK_Unigene_026304	2.94575e-24	-0.770307	down	Hexokinase-3 (HXK3)
	BMK_Unigene_034036	1.6302e-05	1.4457	up	Malate dehydrogenase (Os10g0478200)
	BMK_Unigene_032759	2.41233e-05	0.599654	up	Probable S-sulfocysteine synthase (At3g03630)
	BMK_Unigene_011169	1.34425e-133	2.3751	up	Ribulose bisphosphate carboxylase small chain
	BMK_Unigene_025975	4.02403e-23	1.15778	up	Fructose-bisphosphate aldolase (ALDP)
	BMK_Unigene_072413	0.000349364	-1.01901	down	Hexokinase-9 (HXK9)
	BMK_Unigene_137240	0.00214881	0.79473	up	NADP-dependent malic enzyme 1 (NADP-ME1)
	BMK_Unigene_071807	0.00568907	0.66888	up	Probable ribose-5-phosphate isomerase 4 (RPI4)
	BMK_Unigene_044201	1.26718e-28	2.83618	up	Fructose-bisphosphate aldolase 5 (FBA5)
	BMK_Unigene_070861	1.69551e-10	0.897691	up	NADP-dependent glyceraldehyde-3-phosphate dehydrogenase (GAPN)
	BMK_Unigene_003386	2.22862e-21	-0.595272	down	NADP-dependent malic enzyme (ME6)
	BMK_Unigene_186784	3.27358e-07	0.908714	up	Phosphoglycolate phosphatase 1B (PGLP1B)
DNA replication (ko03030)	BMK_Unigene_065425	1.75925e-05	-1.39096	down	Replication protein A 70 kDa DNA-binding subunit B (RPA1B)
	BMK_Unigene_130712	9.47453e-10	1.68172	up	--
	BMK_Unigene_072774	0.00147117	-0.697035	down	--
	BMK_Unigene_059965	1.27901e-12	-0.780823	down	DNA replication licensing factor MCM6 (Os05g0235800)
	BMK_Unigene_073401	0.00104781	-0.799375	down	--
	BMK_Unigene_143504	0.000114856	0.591973	up	Replication protein A 70 kDa DNA-binding subunit C (RPA1C)
	BMK_Unigene_139278	5.11589e-11	-1.22516	down	--
	BMK_Unigene_036902	9.08219e-11	-0.911603	down	DNA polymerase delta catalytic subunit (POLD1)
	BMK_Unigene_151300	0.000115266	-0.705353	down	--
	BMK_Unigene_036238	1.60051e-05	-1.44861	down	--
	BMK_Unigene_128493	0.00445529	-0.889672	down	Replication protein A 70 kDa DNA-binding subunit B (RPA1B)
	BMK_Unigene_064486	0.0007486	1.05359	up	--
	BMK_Unigene_121548	3.07235e-09	-0.785113	down	Proliferating cell nuclear antigen (Os02g0805200)
	BMK_Unigene_073594	0.000394489	-0.790259	down	Replication protein A 70 kDa DNA-binding subunit C (RPA1C)
	BMK_Unigene_073163	8.48889e-11	-0.754464	down	Replication factor C subunit 1 (RFC1)
	BMK_Unigene_151312	0.000446967	0.981597	up	Replication protein A 70 kDa DNA-binding subunit B (RPA1B)
	BMK_Unigene_068565	7.451e-10	0.9632	up	Replication protein A 70 kDa DNA-binding subunit C (RPA1C)
